# Supplementary material
Source: ML conference proceedings conference paper supplement (https://proceedings.neurips.cc/paper_files/paper/2018/hash/2c3ddf4bf13852db711dd1901fb517fa-Abstract.html)
Supplement: Supplementary file [file 2c3ddf4bf13852db711dd1901fb517fa-Supplemental.zip]

## A Nonconvex Functions

### A.1 Modification of MCP and SCAD

For the minimax concave penalty (MCP) [39]:

$$\phi(|\alpha|) = \begin{cases} |\alpha| - \frac{\alpha^2}{2\theta} & |\alpha| \leq \theta \\ \frac{1}{2}\theta & |\alpha| > \theta \end{cases}.$$

MCP does not meet Assumption 1 as  $\phi$  is not strictly increasing when  $|\alpha| > \theta$ . To avoid this problem, we can modify its  $\phi$  as  $\tilde{\phi}(|\alpha|) = \phi(|\alpha|) + \delta|\alpha|$ , where  $\delta > 0$  is a small constant (Figure 1(d)). The smoothly clipped absolute deviation (SCAD) penalty [13] can be modified in the same way (Figure 1(e)).

### A.2 Definitions

Table 5 shows the nonconvex functions that can be used by RMFML.

Table 5: Example nonconvex regularizers ( $\theta > 2$  for SCAD and  $\theta > 0$  for others is a constant). Here,  $\delta > 0$  is a small constant to ensure that the  $\phi$ 's for MCP and SCAD are strictly increasing.

|                                                    | $\phi( \alpha )$                                                                                                                                                                                                                       |
|----------------------------------------------------|----------------------------------------------------------------------------------------------------------------------------------------------------------------------------------------------------------------------------------------|
| Geman penalty                                      | $\frac{ \alpha }{\theta +  \alpha }$                                                                                                                                                                                                   |
| Laplace penalty                                    | $1 - \exp\left(-\frac{ \alpha }{\theta}\right)$                                                                                                                                                                                        |
| log-sum-penalty (LSP)                              | $\log\left(1 + \frac{ \alpha }{\theta}\right)$                                                                                                                                                                                         |
| minimax concave penalty (MCP)                      | $\begin{cases} (1 + \delta) \alpha  - \frac{\alpha^2}{2\theta} & \alpha \leq \theta \\ \frac{1}{2}\theta^2 + \delta \alpha  & \alpha > \theta \end{cases}$                                                                             |
| smoothly clipped absolute deviation (SCAD) penalty | $\begin{cases} (1 + \delta) \alpha  &  \alpha  \leq 1 \\ \frac{-\alpha^2 + 2\theta \alpha  - 1}{2(\theta - 1)} + \delta \alpha  & 1 <  \alpha  \leq \theta \\ \frac{(1 + \theta)}{2} + \delta \alpha  &  \alpha  > \theta \end{cases}$ |

## B Details of the APG Algorithm

### B.1 Computing the Gradient

The complete procedure for computing the gradient is shown in Algorithm 2.

---

**Algorithm 2** Computing  $\nabla \mathcal{D}^k(x)$  by exploiting sparsity.

---

- 1: set  $X_{i_t j_t} = x_t$  for all  $(i_t, j_t) \in \Omega$ ; // i.e.,  $X = \mathcal{H}_\Omega(x)$
  - 2:  $Q^k = A_r^k(XV^k) - \lambda(A_r^k U^k)$ ;
  - 3: obtain  $\hat{g}^k \in \mathbb{R}^{\text{nnz}(W)}$  with  $\hat{g}_t^k = \sum_{q=1}^r Q_{i_t q}^k V_{j_t q}^k$ ;
  - 4:  $P^k = A_c^k(X^\top U^k) - \lambda(A_c^k V^k)$ ;
  - 5: obtain  $\check{g}^k \in \mathbb{R}^{\text{nnz}(W)}$  with  $\check{g}_t^k = \sum_{q=1}^r U_{i_t q}^k P_{j_t q}^k$ ; // i.e.,  $\check{g}^k = \mathcal{H}_\Omega^{-1}(U^k(P^k)^\top)$
  - 6: **return**  $\hat{g}^k + \check{g}^k - \mathcal{H}_\Omega^{-1}(M)$ .
- 

### B.2 Computing the Objective

By the definition of  $\mathcal{H}_\Omega(x)$ , we construct a sparse matrix  $X = \mathcal{H}_\Omega(x)$ . We then compute the first term in (5) as  $\frac{1}{2}\|P^k\|_F^2$  where  $P^k = XV^k - \lambda U^k$ . Note that  $X$  is sparse with  $O(\text{nnz}(W))$  nonzero elements and  $A_r^k$  is a diagonal, the computation of the first term in (5) takes  $O(\text{nnz}(W)r + mr)$  time, where  $r$  is the number of columns in  $U^k$ . Let  $y = \mathcal{H}_\Omega^{-1}(M)$ . The second term in (5) can then be computed as  $\sum_{i=1}^{\text{nnz}(W)} x_i y_i$ , which takes  $O(\text{nnz}(W))$  time. For the last term in (5), it can be computed similarly as the first term in  $O(\text{nnz}(W)r + nr)$  time. Moreover, we can see that only  $O(\text{nnz}(W) + (m + n)r)$  space is needed.

The whole procedure for computing the objective is shown in Algorithm 3. It takes a total of  $O(\text{nnz}(W) + (m + n)r)$  space and  $O(\text{nnz}(W)r + (m + n)r)$  time.

---

**Algorithm 3** Computing  $\mathcal{D}^k(x)$  by exploiting sparsity.

---

- 1: set  $X_{i_t j_t} = x_t$  for all  $(i_t, j_t) \in \Omega$ ;
  - 2:  $a_1 = \frac{1}{2} \|\sqrt{A_r^k} P^k\|_F^2$  where  $P^k = X V^k - \lambda U^k$ ;
  - 3:  $a_2 = \frac{1}{2} \|\sqrt{A_c^k} Q^k\|_F^2$  where  $Q^k = X^\top U^k - \lambda V^k$ ;
  - 4:  $a_3 = \sum_{i=1}^{\text{nnz}(W)} x_i y_i$  where  $y = \mathcal{H}_\Omega^{-1}(M)$ ;
  - 5: **return**  $a_1 + a_2 + a_3$ .
- 

### B.3 Computing the Proximal Step

For the proximal step with (5), a closed-form solution can be obtained by the following Lemma.

**Lemma B.1** ([4]). *For any given  $z$ ,  $x^* = \arg \min_{x \in \mathcal{W}^k} \frac{1}{2} \|x - z\|_F^2 = [\text{sign}(z_i) \min(|z_i|, (w_i^k)^{-1})]$ .*

## C Clarke Subdifferential

We first introduce two definitions from [10].

**Definition C.1** (Clarke subdifferential). *Let  $f : \mathbb{R}^{m \times n} \rightarrow \mathbb{R}$  be a locally Lipschitz function.<sup>2</sup> The Clarke generalized directional derivative of  $f$  at  $X$  in the direction of  $V$  is:*

$$f^\circ(X, V) \equiv \limsup_{Y \rightarrow X, \lambda \rightarrow 0} \frac{1}{\lambda} [f(Y + \lambda V) - f(Y)].$$

The Clarke subdifferential of  $f$  at  $X$  is

$$\partial^\circ f(X) \equiv \{\xi : f^\circ(X, V) \geq \text{tr}(\xi^\top V), \forall V \in \mathbb{R}^{m \times n}\}.$$

Note that  $f$  in Definition C.1 can be neither convex nor smooth.

**Definition C.2** (Critical point). *A point  $X$  is a critical point of  $f$  if it satisfies  $0 \in \partial^\circ f(X)$ .*

## D Proofs

### D.1 Preliminaries

In the section, we first introduce some Lemmas that will be used later in the proof.

The critical points for problem (4) are defined in the following Lemma.

**Lemma D.1.** *Let  $C = M - UV^\top$ .  $(U, V)$  is a critical point of (4) if  $0 \in (W \odot S)V + \lambda U$  and  $0 \in (W \odot S)^\top U + \lambda V$ , where  $S_{ij} = \text{sign}(C_{ij}) \phi'(|C_{ij}|)$  if  $C_{ij} \neq 0$ , and  $S_{ij} \in [-\phi'(0), \phi'(0)]$  otherwise.*

*Proof.* For a nonconvex penalty function  $\phi$  satisfying Assumption 1, from Proposition 5 in [15], its Clark subdifferential is

$$\begin{cases} \partial^\circ \phi(|\alpha|) = \text{sign}(\alpha) \cdot \phi'(|\alpha|) & \text{if } \alpha \neq 0 \\ \partial^\circ \phi(|\alpha|) \in [-\phi'(0), \phi'(0)] & \text{otherwise} \end{cases}. \quad (7)$$

By Definition C.2, if  $(U, V)$  is a critical point of (4), it satisfies

$$(0, 0) \in \partial^\circ \dot{H}(U, V). \quad (8)$$

Combining (7) and (8), we obtain the Lemma.  $\square$

---

<sup>2</sup>A function is called locally Lipschitz continuous if for every  $X$  in its domain there exists a neighborhood  $\mathcal{U}$  of  $X$  such that  $f$  restricted to  $\mathcal{U}$  is Lipschitz continuous.

**Lemma D.2.** Define the row sum  $\text{sum}(\dot{W}_{(i,:)}^k) = \sum_{j=1}^n \dot{W}_{ij}^k$ , and the column sum  $\text{sum}(\dot{W}_{(:,j)}^k) = \sum_{i=1}^m \dot{W}_{ij}^k$ . Then,  $\|\dot{W}^k \odot (\bar{U}\bar{V}^\top)\|_1 \leq \frac{1}{2}\|\Lambda_r^k \bar{U}\|_F^2 + \frac{1}{2}\|\Lambda_c^k \bar{V}\|_F^2$ , where

$$\Lambda_r^k = \text{Diag}(\sqrt{\text{sum}(\dot{W}_{(1,:)}^k)}, \dots, \sqrt{\text{sum}(\dot{W}_{(m,:)}^k)}),$$

and

$$\Lambda_c^k = \text{Diag}(\sqrt{\text{sum}(\dot{W}_{(:,1)}^k)}, \dots, \sqrt{\text{sum}(\dot{W}_{(:,n)}^k)}).$$

Equality holds iff  $(\bar{U}, \bar{V}) = (0, 0)$ .

*Proof.* First, we have

$$\begin{aligned} \|\dot{W}^k \odot (\bar{U}\bar{V}^\top)\|_1 &= \left\| \dot{W}^k \odot \begin{bmatrix} \underline{u}_1^\top \underline{v}_1 & \cdots & \underline{u}_1^\top \underline{v}_n \\ \vdots & & \vdots \\ \underline{u}_m^\top \underline{v}_1 & \cdots & \underline{u}_m^\top \underline{v}_n \end{bmatrix} \right\|_1 \\ &= \sum_{i=1}^m \sum_{j=1}^n \dot{W}_{ij}^k |\underline{u}_i^\top \underline{v}_j|, \end{aligned} \quad (9)$$

where  $\underline{u}_i$  is the  $i$ th row in  $\bar{U}$  (similar, for  $\underline{v}_j$  in  $\bar{V}$ ). From the Cauchy inequality, we have

$$|\underline{u}_i^\top \underline{v}_j| \leq \|\underline{u}_i\|_2 \|\underline{v}_j\|_2 \leq \frac{1}{2} (\|\underline{u}_i\|_2^2 + \|\underline{v}_j\|_2^2).$$

Together with (9), we have

$$\|\dot{W}^k \odot (\bar{U}\bar{V}^\top)\|_1 \leq \frac{1}{2} \sum_{i=1}^m \sum_{j=1}^n \dot{W}_{ij}^k (\|\underline{u}_i\|_2^2 + \|\underline{v}_j\|_2^2) = \frac{1}{2} \|\Lambda_r^k \bar{U}\|_F^2 + \frac{1}{2} \|\Lambda_c^k \bar{V}\|_F^2,$$

and the equality holds only when  $(\bar{U}, \bar{V}) = (0, 0)$ .  $\square$

## D.2 Proposition 3.1

*Proof.* Note that  $\phi(x)$  is concave on  $x \geq 0$ . For any  $y \geq 0$ , we have

$$\phi(y) \leq \phi(x) + (y - x)\phi'(x).$$

Let  $y = |\beta|$  and  $x = |\alpha|$ . We obtain

$$\phi(|\beta|) \leq \phi(|\alpha|) + (|\beta| - |\alpha|)\phi'(|\alpha|).$$

As  $\phi$  is concave and strictly increasing on  $\mathbb{R}^+$ , equality holds iff  $\beta = \pm\alpha$ .  $\square$

## D.3 Corollary 3.2

*Proof.* This Corollary can be easily obtained (i) using Proposition 3.1 on the nonconvex loss in (4); and (ii)  $U = U^k + \bar{U}$  and  $V = V^k + \bar{V}$ .  $\square$

## D.4 Proposition 3.3

*Proof.* From the Cauchy inequality, we have

$$\begin{aligned} &\|\dot{W}^k \odot (M - (U^k + \bar{U})(V^k + \bar{V})^\top)\|_1 \\ &\leq \|\dot{W}^k \odot (M - U^k(V^k)^\top - \bar{U}(V^k)^\top - U^k\bar{V}^\top)\|_1 + \|\dot{W}^k \odot (\bar{U}\bar{V}^\top)\|_1. \end{aligned} \quad (10)$$

For the last term, using Lemma D.2, we have

$$\|\dot{W}^k \odot (\bar{U}\bar{V}^\top)\|_1 \leq \frac{1}{2} (\|\Lambda_r^k \bar{U}\|_F^2 + \|\Lambda_c^k \bar{V}\|_F^2). \quad (11)$$

Combining (10) and (11), we have

$$\begin{aligned} &\sum_{i=1}^m \sum_{j=1}^n \dot{W}_{ij}^k \phi(|M_{ij} - [UV^\top]_{ij}|) \leq \|\dot{W}^k \odot (M - (U^k + \bar{U})(V^k + \bar{V})^\top)\|_1 \\ &\quad + \frac{1}{2} (\|\Lambda_r^k \bar{U}\|_F^2 + \|\Lambda_c^k \bar{V}\|_F^2) + b^k. \end{aligned} \quad (12)$$

Adding  $\frac{\lambda}{2}\|U^k + \bar{U}\|_F^2 + \frac{\lambda}{2}\|V^k + \bar{V}\|_F^2$  to both side of (12), we obtain the Proposition.

Besides, from Lemma D.2, the equality in the Proposition holds only when  $(\bar{U}, \bar{V}) = (0, 0)$ .  $\square$

### D.5 Proposition 3.4

*Proof.* Using the fact that  $\|X\|_1 = \max_{\|Y\|_\infty \leq 1} \text{tr}(X^\top Y)$  [4], where  $\|Y\|_\infty = \max_{i,j} |Y_{ij}|$  is the  $\ell_\infty$ -norm,  $\mathcal{D}^k(x)$  can be rewritten as

$$\max_{x \in \mathcal{W}^k} \min_{\bar{U}, \bar{V}} \mathcal{P}(x, \bar{U}, \bar{V}),$$

where

$$\begin{aligned} \mathcal{P}(x, \bar{U}, \bar{V}) \equiv & \text{tr}(\mathcal{H}_\Omega(x)^\top (M - \bar{U}(V^k)^\top - U^k \bar{V}^\top)) \\ & + \frac{\lambda}{2} \|U^k + \bar{U}\|_F^2 + \frac{1}{2} \|\Lambda_r^k \bar{U}\|_F^2 + \frac{\lambda}{2} \|V^k + \bar{V}\|_F^2 + \frac{1}{2} \|\Lambda_c^k \bar{V}\|_F^2. \end{aligned} \quad (13)$$

As (13) is an unconstrained, smooth and convex problem on  $\bar{U}$ , the optimal solution is obtained when  $\nabla_{\bar{U}} \mathcal{P}(X, \bar{U}, \bar{V}) = 0$ . Then,

$$\bar{U} = A_r^k(\mathcal{H}_\Omega(x) V^k - \lambda U^k). \quad (14)$$

Similarly, we obtain

$$\bar{V} = A_c^k(\mathcal{H}_\Omega(x)^\top U^k - \lambda V^k). \quad (15)$$

Substituting (14) and (15) back into (13), we obtain  $\mathcal{D}^k(X)$  in the Proposition.  $\square$

### D.6 Proposition 3.5

First, Proposition 3.5 can be written as follows.

**Proposition D.3.** *For Algorithm 1,*

- (i).  $\{(U^k, V^k)\}$  is bounded.
- (ii).  $\{(U^k, V^k)\}$  has a sufficient decrease on  $\dot{H}$ , i.e.,  $\dot{H}(U^k, V^k) - \dot{H}(U^{k+1}, V^{k+1}) \geq \gamma \|U^{k+1} - U^k\|_F^2 + \gamma \|V^{k+1} - V^k\|_F^2$ , where  $\gamma > 0$  is a constant; and
- (iii).  $\lim_{k \rightarrow \infty} (U^{k+1} - U^k) = 0$  and  $\lim_{k \rightarrow \infty} (V^{k+1} - V^k) = 0$ .

*Proof.* First note that

$$\inf_{U, V} H(U, V) \geq 0, \quad \lim_{\substack{\|U\|_F \rightarrow \infty \\ \|V\|_F \rightarrow \infty}} H(U, V) = \infty. \quad (16)$$

Then, the sequence  $\{U^k\}$  and  $\{V^k\}$  is bounded, and we obtain the result in part (i).

Thus, there exists a positive constant  $c$  such that

$$c_1 \geq |[U^k(V^k)^\top]_{ij}|, \quad \forall i, j, k.$$

From Assumption 1,  $\phi$  is a strictly increasing function, thus  $\phi' > 0$ . Then, there exists a positive constant  $c_2$  such that

$$\phi'(|[U^k(V^k)^\top]_{ij}|) \geq c_2 \equiv \phi'(c_1).$$

From Assumption 2, each row and column in  $W$  has at least one nonzero element. By the definition of  $\Lambda_r^k$  in Proposition 3.3, its diagonal elements are given by

$$[\Lambda_r^k]_{ii} \geq \sqrt{\sum_{j=1}^n W_{ij} c_2}.$$

The same holds for  $\Lambda_c^k$ . Thus, there exists a constant  $\alpha > 0$  such that all diagonal elements in  $\Lambda_r^k$  and  $\Lambda_c^k$  are not smaller than  $\alpha$ .

As  $(\bar{U}^k, \bar{V}^k)$  is the optimal solution of  $\min \dot{F}^k$ , then

$$(0, 0) \in \partial \dot{F}^k(\bar{U}^k, \bar{V}^k). \quad (17)$$

Define

$$j^k(\bar{U}, \bar{V}) \equiv \|\dot{W}^k \odot (M - U^k(V^k)^\top - \bar{U}(V^k)^\top - U^k \bar{V}^\top)\|_1 + \frac{\lambda}{2} \|U^k + \bar{U}\|_F^2 + \frac{\lambda}{2} \|V^k + \bar{V}\|_F^2 + b^k.$$

Recall the definition of  $\dot{F}^k$ . From (17), we have

$$(G_{\bar{U}^k}, G_{\bar{V}^k}) \in \partial \bar{J}^k(\bar{U}^k, \bar{V}^k).$$

Thus,

$$(0, 0) = (G_{\bar{U}^k}, G_{\bar{V}^k}) + ((\Lambda_r^k)^2 \bar{U}, (\Lambda_c^k)^2 \bar{V}). \quad (18)$$

Multiplying  $(\bar{U}^k, \bar{V}^k)$  on both side of (18), we have

$$0 = \text{tr}(G_{\bar{U}^k}^\top \bar{U}^k) + \text{tr}(G_{\bar{V}^k}^\top \bar{V}^k) + \|(\Lambda_r^k)^2 \bar{U}\|_F^2 + \|(\Lambda_c^k)^2 \bar{V}\|_F^2. \quad (19)$$

As  $j^k$  is a convex function, by the definition of the subgradient, we have

$$j^k(0, 0) \geq j^k(\bar{U}^k, \bar{V}^k) - \text{tr}(G_{\bar{U}^k}^\top \bar{U}^k) - \text{tr}(G_{\bar{V}^k}^\top \bar{V}^k). \quad (20)$$

Combining (19) and (20), we obtain

$$\begin{aligned} j^k(0, 0) &\geq j^k(\bar{U}^k, \bar{V}^k) + \|(\Lambda_r^k)^2 \bar{U}\|_F^2 + \|(\Lambda_c^k)^2 \bar{V}\|_F^2 \\ &\geq \dot{H}^k(\bar{U}^k, \bar{V}^k) + \frac{1}{2} \|(\Lambda_r^k)^2 \bar{U}\|_F^2 + \frac{1}{2} \|(\Lambda_c^k)^2 \bar{V}\|_F^2. \end{aligned} \quad (21)$$

Note that

$$\begin{aligned} j^k(\mathbf{0}, \mathbf{0}) &= H(U^k, V^k), \\ \dot{H}^k(\bar{U}^k, \bar{V}^k) &= H(U^{k+1}, V^{k+1}), \end{aligned}$$

and using (21), we have

$$H(U^k, V^k) - H(U^{k+1}, V^{k+1}) \geq \frac{1}{2} \|\Lambda_r^k \bar{U}^k\|_F^2 + \frac{1}{2} \|(\Lambda_c^k)^2 \bar{V}^k\|_F^2 \geq \frac{\alpha}{2} (\|\bar{U}^k\|_F^2 + \|\bar{V}^k\|_F^2). \quad (22)$$

Thus, we obtain the result in part (ii) in Proposition 3.5 (with  $\gamma = \alpha/2$ ).

Summing all inequalities in (22) from  $k = 1$  to  $K$ , we have

$$H(U^1, V^1) - H(U^{K+1}, V^{K+1}) \geq \sum_{k=1}^K \frac{\alpha}{2} \|\bar{U}^k\|_F^2 + \frac{\alpha}{2} \|\bar{V}^k\|_F^2.$$

From (16), we have

$$\sum_{k=1}^{\infty} \|\bar{U}^k\|_F^2 < \infty, \sum_{k=1}^{\infty} \|\bar{V}^k\|_F^2 < \infty, \quad (23)$$

which indicates that

$$\begin{aligned} \lim_{k \rightarrow \infty} \|\bar{U}^k\|_F^2 &= \lim_{k \rightarrow \infty} \|U^k - U^{k+1}\|_F^2 = 0, \\ \lim_{k \rightarrow \infty} \|\bar{V}^k\|_F^2 &= \lim_{k \rightarrow \infty} \|V^k - V^{k+1}\|_F^2 = 0. \end{aligned}$$

Then, we have the result in part (iii).  $\square$

## D.7 Proposition D.4

The following connects the subgradient of surrogate  $\dot{F}^k$  to the Clarke subdifferential of  $\dot{H}$ .

**Proposition D.4.** (i)  $\partial \dot{F}^k(0, 0) = \partial^\circ \dot{H}^k(0, 0)$ ; (ii) If  $0 \in \partial^\circ \dot{H}^k(0, 0)$ , then  $(U^k, V^k)$  is a critical point of (4).

*Proof.* **Part (i).** We prove this by the Clark subdifferential of  $\dot{H}^k$  and subgradient of  $\dot{F}^k$ .

- Clark subdifferential of  $\dot{H}^k$ : Let  $C^H = M - UV^\top$ . By the definition of Clark differential, we have

$$\partial_U^\circ \dot{H}^k(\bar{U}, \bar{V}) = (W \odot S^H)(V^k + \bar{V}) + \lambda(U^k + \bar{U}), \quad (24)$$

$$\partial_V^\circ \dot{H}^k(\bar{U}, \bar{V}) = (W \odot S^H)^\top(U^k + \bar{U}) + \lambda(V^k + \bar{V}), \quad (25)$$

where  $S_{ij}^H = \text{sign}(C_{ij}^H) \cdot \phi'(|C_{ij}^H|)$  if  $C_{ij}^H \neq 0$ , and  $S_{ij}^H \in [-\phi'(0), \phi'(0)]$  otherwise.

- Subgradient of  $\dot{F}^k$ : Let  $C^F = M - U^k(V^k)^\top - \bar{U}^k(V^k)^\top - U^k(\bar{V}^k)^\top$ . For  $\dot{F}^k$ , we have

$$\partial_U \dot{F}^k(\bar{U}, \bar{V}) = (\dot{W}^k \odot S^F)(V^k + \bar{V}^k) + \lambda(U^k + \bar{U}) + (\Lambda_r^k)^2 \bar{U}, \quad (26)$$

$$\partial_V \dot{F}^k(\bar{U}, \bar{V}) = (\dot{W}^k \odot S^F)^\top(U^k + \bar{U}^k) + \lambda(V^k + \bar{V}) + (\Lambda_c^k)^2 \bar{V}, \quad (27)$$

where  $S_{ij}^F = \text{sign}(C_{ij}^F)$  if  $C_{ij}^F \neq 0$ , and  $S_{ij}^F \in [-1, 1]$  otherwise.

Note that when  $\bar{U} = 0$  and  $\bar{V} = 0$ , we have  $C^H = C^F$ . By the definition of  $\dot{W}^k = A^k \odot W$ , we also have  $W \odot S^H = \dot{W}^k \odot S^F$ . Finally, the last term in (26) vanishes to zero as  $\bar{U} = 0$ . Thus, (24) is exactly the same as (26). Similarly (25) is also the same as (27). As a result, we have  $\partial^\circ \dot{F}^k(0, 0) = \partial^\circ \dot{H}^k(0, 0)$ .

**Part (ii).** From the definition of  $\dot{H}$  in (4) and  $\dot{H}^k$  in Proposition 3.3, we have

$$\dot{H}^k(\bar{U}, \bar{V}) = \dot{H}(U^k + \bar{U}, V^k + \bar{V}).$$

Thus, if  $(0, 0) \in \partial^\circ \dot{H}^k(0, 0)$ , we have

$$(0, 0) \in \partial^\circ \dot{H}(U^k, V^k),$$

which shows that  $(U^k, V^k)$  is a critical point.  $\square$

## D.8 Theorem 3.6

*Proof.* From Proposition 3.5, we know that there is at least one limit point for the sequence  $\{(U^k, V^k)\}$ . Let  $\{(U^{k_j}, V^{k_j})\}$  be one of its subsequences, and

$$U^* = \lim_{k_j \rightarrow \infty} U^{k_j}, \quad V^* = \lim_{k_j \rightarrow \infty} V^{k_j},$$

where  $(U^*, V^*)$  is a limit point. Using Proposition D.4, we have

$$\lim_{k_j \rightarrow \infty} \partial^\circ \dot{F}^{k_j}(\bar{U}_{k_j}, \bar{V}_{k_j}) = \lim_{k_j \rightarrow \infty} \partial^\circ \dot{F}^{k_j}(0, 0) = \lim_{k_j \rightarrow \infty} \partial^\circ \dot{H}^{k_j}(0, 0) = \partial^\circ \dot{H}(U^*, V^*).$$

Thus,  $(0, 0) \in \partial^\circ \dot{H}(U^*, V^*)$ , which shows that  $(U^*, V^*)$  is a critical point (Lemma D.1).  $\square$

## E Additional Materials for the Experiments

### E.1 Statistics of *MovieLens*.

The statistics of *MovieLens* data sets are in following Table 6.

Table 6: *MovieLens* data sets used.

|                       | number of users | number of movies | number of ratings | % nonzero elements |
|-----------------------|-----------------|------------------|-------------------|--------------------|
| <i>MovieLens-100K</i> | 943             | 1,682            | 100,000           | 6.30               |
| <i>MovieLens-1M</i>   | 6,040           | 3,449            | 999,714           | 4.80               |
| <i>MovieLens-10M</i>  | 69,878          | 10,677           | 10,000,054        | 1.34               |
